# Supplementary material for: Circadian clock protein CRY1 prevents paclitaxel-induced senescence of bladder cancer cells by promoting p53 degradation
Source: PubMed Central journal article supplement — Oncol Rep. 2020 Dec 30;45(3):1033–43. doi: 10.3892/or.2020.7914 (PMC7860017; doi:10.3892/or.2020.7914), 2020-12-30

Figure S1. Screening of Res cells. Res cell lines were established via long term incubation with cisplatin. The selected cells and their parental cells were treated with indicative anti-cancer drugs (PTX and cisplatin) for 2 days, and cell viability was valued using a MTS assay. Data show the  $IC_{50}$ , and are presented as the mean  $\pm$  SD of three independent experiments. Res, cisplatin-resistant cells; PTX, paclitaxel.

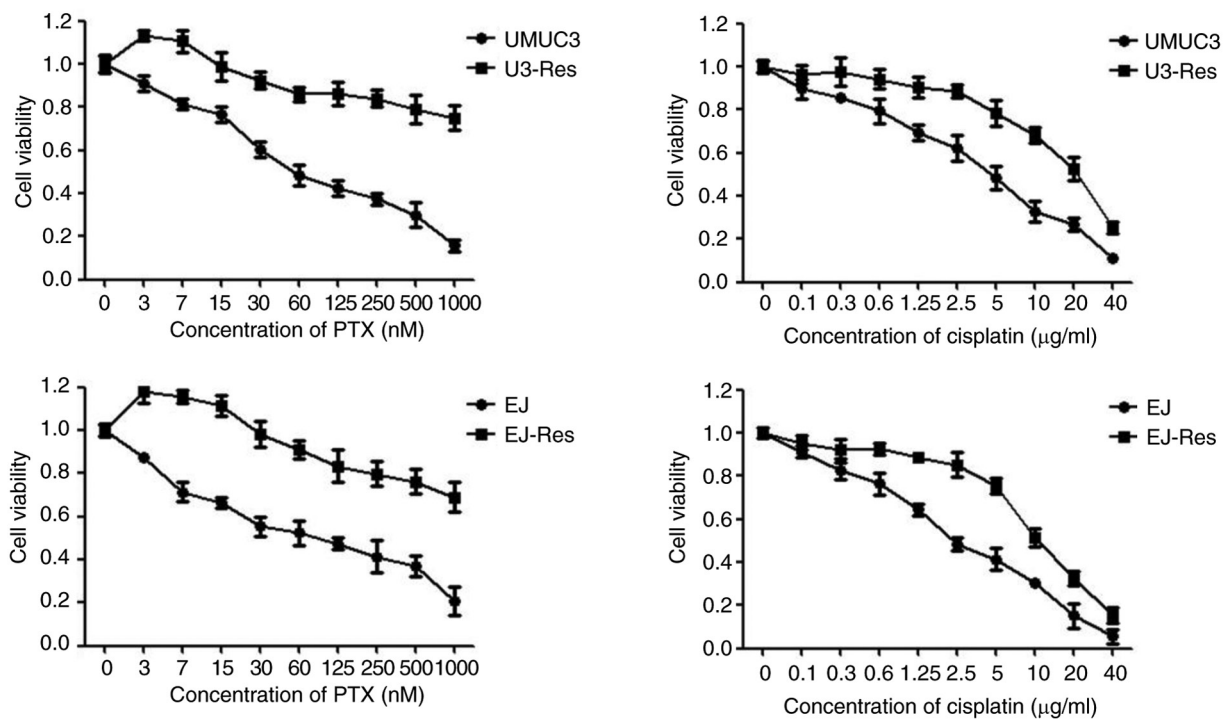

Figure S2. EJ Res cells enter quiescence with prolonged circadian period. Cells were synchronized with 0.1  $\mu$ M dexamethasone for 2 h, and were collected at every 4 h. The time course of protein (BMAL1, CLOCK, PER2 and CRY1) expression levels were examined using western blotting. GAPDH was used as loading control. Data are presented as the OD fold difference related to the control from three duplicate experiments. CRY1, Cryptochrome 1; PER2, period 2; CLOCK, circadian locomotor output cycles kaput; BMAL1, brain and muscle Arnt-like protein 1; Res, cisplatin-resistant cells; PTX, paclitaxel; OD, optical density; ZT, circadian time.

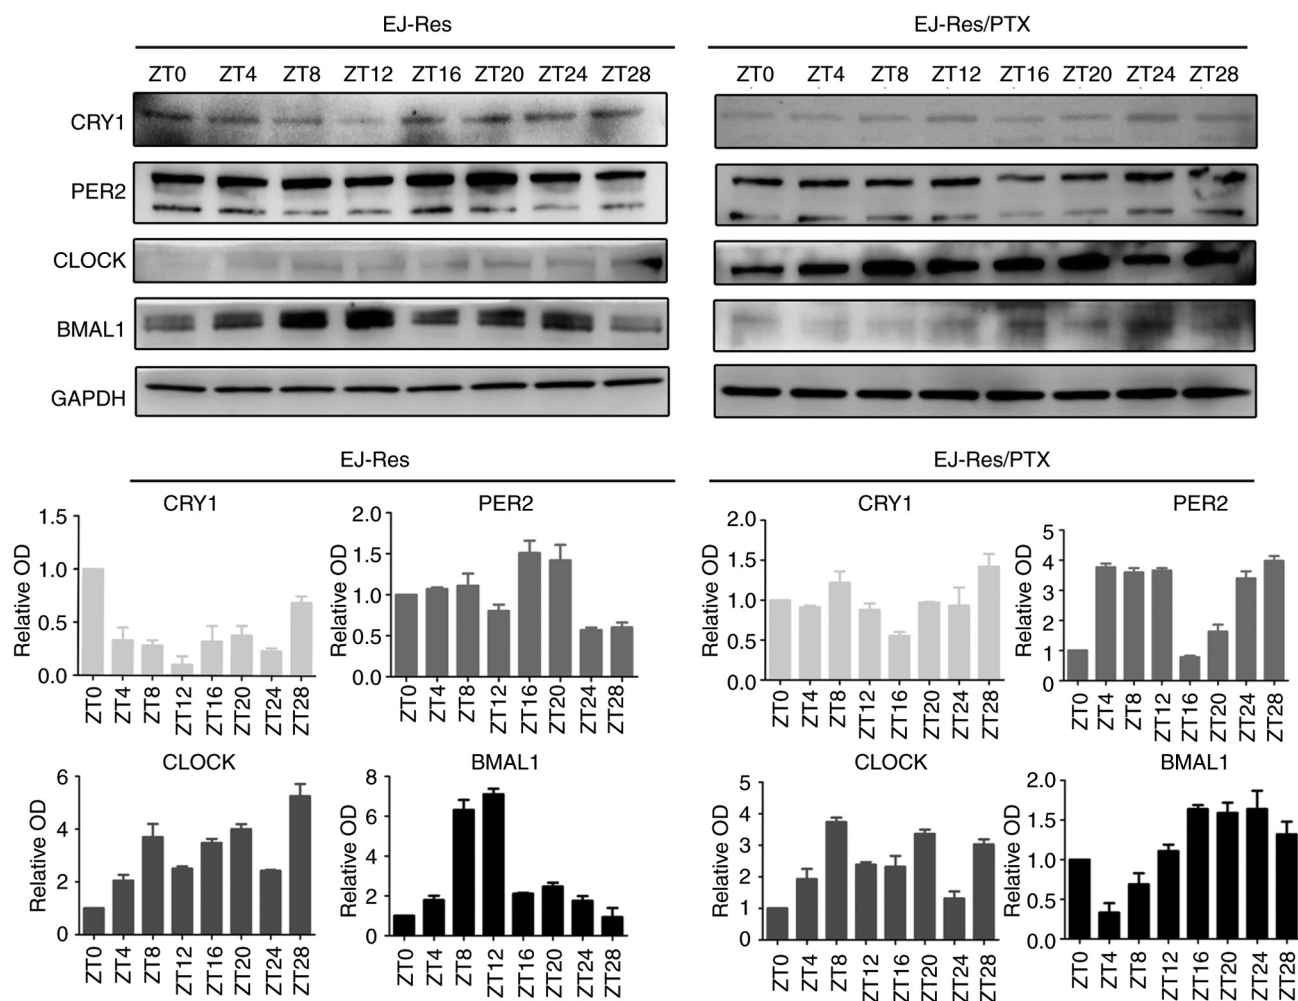

Figure S3. FBS-free-induced quiescent cells exhibit prolonged circadian rhythm. EJ and UMUC3 cells were treated with serum-free medium for 48 h, then synchronized with 0.1  $\mu$ M dexamethasone for 2 h. Cells were collected every 4 h for a total of 48 h to detect mRNA expression. Results were cosine fitted using OriginPro8. CRY1, Cryptochrome 1; PER2, period 2; CLOCK, circadian locomotor output cycles kaput; BMAL1, brain and muscle Arnt-like protein 1; ZT, circadian time.

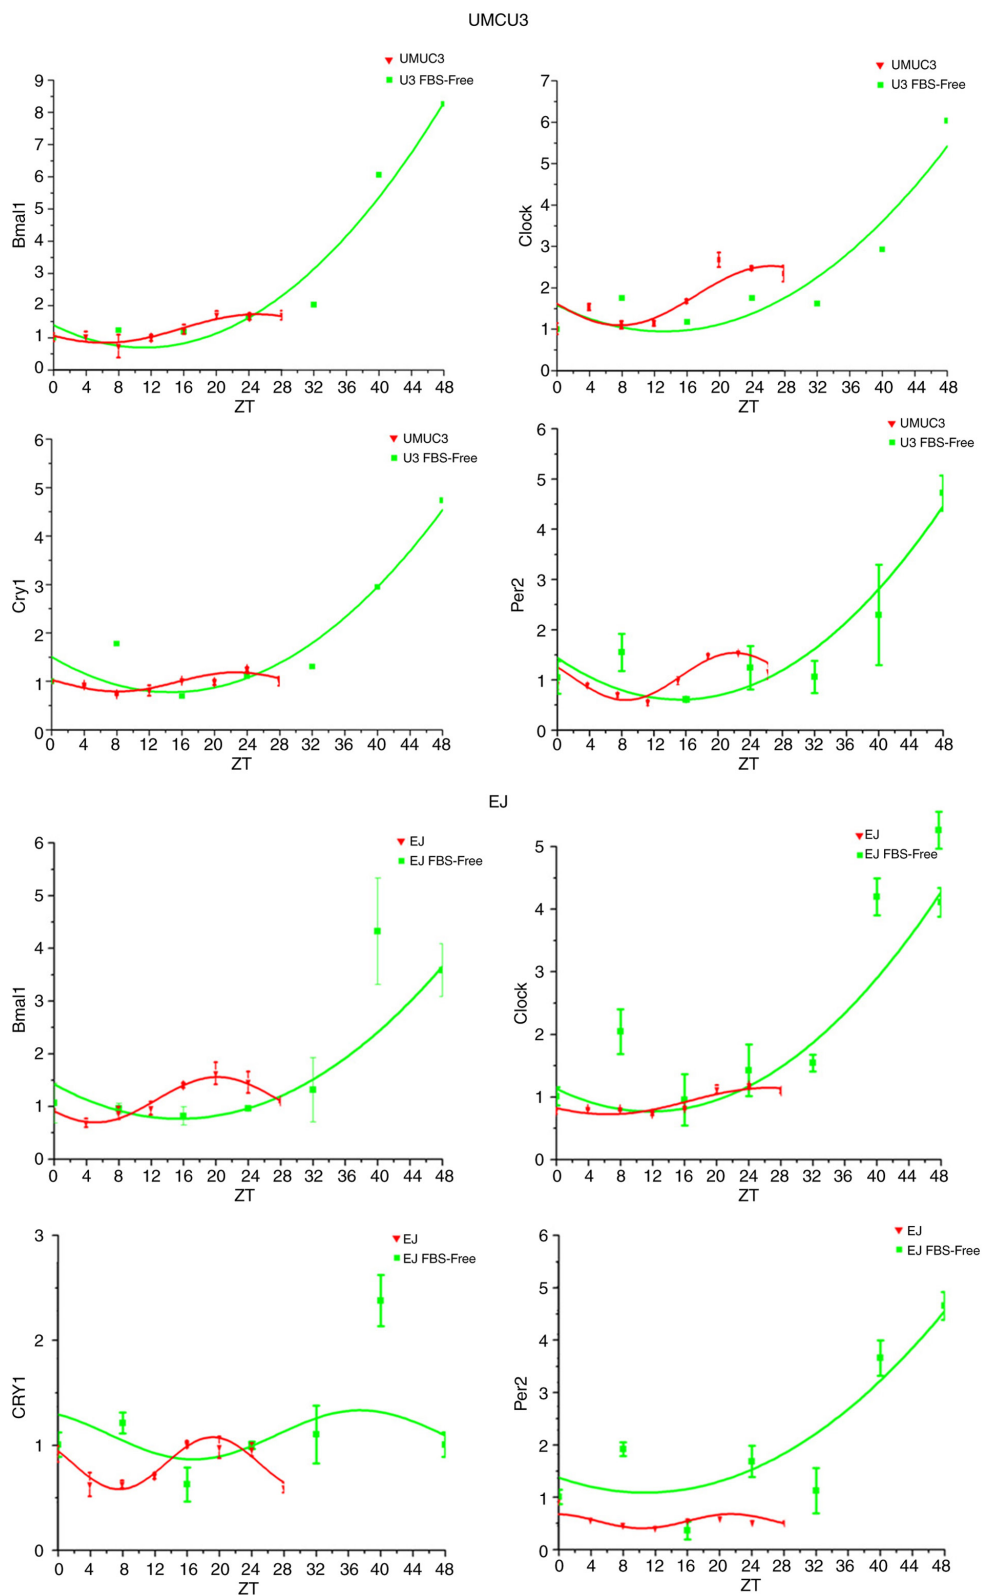

Supplement: Supplementary_Data.pdf [file Supplementary_Data.pdf]
